# Supplementary material
Source: PubMed Central journal article supplement (PMC7854280)
Supplement: mmc1.pdf [file mmc1.pdf]

YMTHE, Volume 29

## **Supplemental Information**

### ***DUX4* Transcript Knockdown with Antisense 2'-O-Methoxyethyl Gapmers for the Treatment of Facioscapulohumeral Muscular Dystrophy**

**Kenji Rowel Q. Lim, Adam Bittel, Rika Maruyama, Yusuke Echigoya, Quynh Nguyen, Yiqing Huang, Kasia Dzierlega, Aiping Zhang, Yi-Wen Chen, and Toshifumi Yokota**

## Supplemental Information

### Supplemental Figures

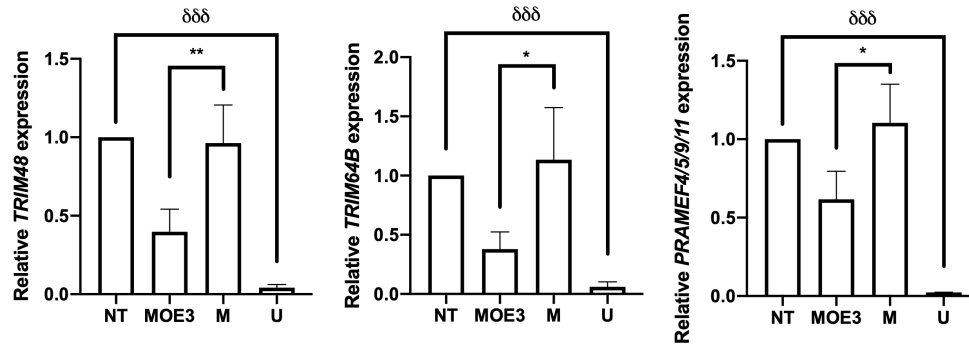

**Figure S1. qPCR analysis of *TRIM48*, *TRIM64B*, and *PRAMEF4/5/9/11* expression (see also Figure 2).** Relative expression levels of *TRIM48*, *TRIM64B*, and *PRAMEF4/5/9/11*, all significantly up-regulated FSHD-associated genes identified from our RNA sequencing analysis, were found to be significantly reduced by MOE3 treatment compared to mock gaper-treated (M) controls. NT, non-treated; U, FSHD-unaffected/healthy. Error bars: S.D., n=3. \* $p < 0.05$ , \*\* $p < 0.005$  vs M, one-way ANOVA with Dunnett's test.  $\delta\delta\delta$   $p < 0.0005$ , unpaired, two-tailed  $t$ -test.

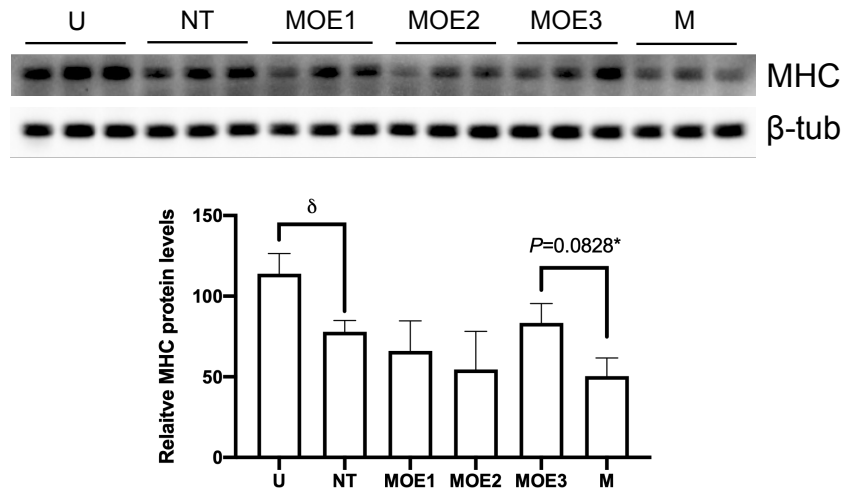

**Figure S2. Western blot analysis of myosin heavy chain protein levels (see also Figure 3).** Myosin heavy chain (MHC) protein levels were detected via Western blot, with  $\beta$ -tubulin ( $\beta$ -tub) as the loading control. Protein samples (12  $\mu$ g) were extracted from healthy WS234 myotubes (U), non-treated FSHD WS229 myotubes (NT), 2'-MOE gapmer-treated WS229 myotubes (MOE1-MOE3), and mock 2'-MOE gapmer-treated WS229 myotubes (M). Top: image of the visualized Western blot, bottom: quantification of MHC protein levels normalized to  $\beta$ -tub and calculated relative to one replicate from the healthy myotube samples. Error bars: S.D., n=3. \*one-way ANOVA with Dunnett's test vs M.  $\delta$   $p < 0.05$ , unpaired, two-tailed  $t$ -test.

## Supplemental Tables

**Table S1.** Information on the 94 FSHD signature genes obtained from RNA sequencing analysis.

| Gene*            | Transcript ID   | Non-treated FSHD vs Healthy** |              |          | Treated FSHD vs Non-treated FSHD** |              |                                      |
|------------------|-----------------|-------------------------------|--------------|----------|------------------------------------|--------------|--------------------------------------|
|                  |                 | log2FC                        | adj. p-value | up/down? | log2FC                             | adj. p-value | significantly restored by treatment? |
| <i>HSPA1B a</i>  | ENST00000391555 | 12.81                         | 1.60E-25     | up       | 0.18                               | 0.05558362   | No                                   |
| <i>MBD3L3</i>    | ENST00000333843 | 10.23                         | 6.80E-16     | up       | -0.66                              | 0.150525844  | No                                   |
| <i>PSMB9 a</i>   | ENST00000453059 | 8.16                          | 1.31E-09     | up       | -0.79                              | 0.320090145  | No                                   |
| <i>PSMB9 b</i>   | ENST00000434471 | 8.16                          | 1.31E-09     | up       | -0.79                              | 0.320090145  | No                                   |
| <i>PSMB9 c</i>   | ENST00000427870 | 8.16                          | 1.31E-09     | up       | -0.79                              | 0.320090145  | No                                   |
| <i>TRIM51</i>    | ENST00000449290 | 7.89                          | 6.11E-09     | up       | -1.18                              | 0.036749033  | Yes                                  |
| <i>KDM4E</i>     | ENST00000450979 | 7.61                          | 2.42E-08     | up       | -0.51                              | 0.670007042  | No                                   |
| <i>PRAMEF17</i>  | ENST00000376098 | 7.59                          | 4.53E-08     | up       | -0.12                              | 0.990219585  | No                                   |
| <i>PFKFB3</i>    | ENST00000536985 | 7.58                          | 4.68E-07     | up       | -2.63                              | 0.58814826   | No                                   |
| <i>AMOT a</i>    | ENST00000371959 | 7.38                          | 2.26E-06     | up       | -0.13                              | 0.992445062  | No                                   |
| <i>PRAMEF9</i>   | ENST00000415919 | 7.38                          | 6.87E-07     | up       | -1.12                              | 0.457011498  | No                                   |
| <i>TFIP11</i>    | ENST00000619735 | 7.37                          | 0.011892526  | up       | 0.49                               | 0.983196789  | No                                   |
| <i>STIL a</i>    | ENST00000337817 | 7.30                          | 0.012435153  | up       | -0.61                              | 0.982576204  | No                                   |
| <i>KHDC1L a</i>  | ENST00000471312 | 7.12                          | 8.45E-07     | up       | 0.48                               | 0.781306098  | No                                   |
| <i>ZNF280A a</i> | ENST00000302097 | 7.09                          | 6.64E-07     | up       | -0.05                              | 0.995731523  | No                                   |
| <i>ZNF280A b</i> | ENST00000620282 | 7.09                          | 6.64E-07     | up       | -0.05                              | 0.995731523  | No                                   |
| <i>PRAMEF10</i>  | ENST00000235347 | 6.87                          | 4.31E-06     | up       | -0.36                              | 0.943642771  | No                                   |
| <i>AMACR</i>     | ENST00000506639 | 6.71                          | 0.034837731  | up       | -0.85                              | 0.978289808  | No                                   |
| <i>KHDC1L b</i>  | ENST00000370388 | 6.48                          | 3.58E-29     | up       | -0.20                              | 0.821838147  | No                                   |
| <i>LEUTX a</i>   | ENST00000396841 | 6.36                          | 1.06E-07     | up       | -0.65                              | 0.30504829   | No                                   |
| <i>LEUTX b</i>   | ENST00000629267 | 6.36                          | 1.06E-07     | up       | -0.65                              | 0.30504829   | No                                   |
| <i>PRAMEF22</i>  | ENST00000616664 | 6.36                          | 3.43E-05     | up       | 0.14                               | 0.991303373  | No                                   |
| <i>AMOT b</i>    | ENST00000304758 | 6.21                          | 6.02E-05     | up       | 0.18                               | 0.987440238  | No                                   |
| <i>TRIM43</i>    | ENST00000272395 | 6.19                          | 1.02E-15     | up       | -1.31                              | 0.00068713   | Yes                                  |
| <i>PRAMEF4</i>   | ENST00000235349 | 6.05                          | 2.74E-05     | up       | -0.50                              | 0.768132302  | No                                   |
| <i>TRIM48</i>    | ENST00000417545 | 5.96                          | 0.000173991  | up       | -1.72                              | 0.249308715  | No                                   |
| <i>SLC34A2 a</i> | ENST00000382051 | 5.88                          | 4.53E-17     | up       | -0.73                              | 3.34E-05     | Yes                                  |
| <i>ZSCAN4</i>    | ENST00000612521 | 5.86                          | 5.07E-16     | up       | -1.15                              | 0.00014191   | Yes                                  |
| <i>PRAMEF2</i>   | ENST00000240189 | 5.76                          | 1.04E-06     | up       | -1.52                              | 0.133552181  | No                                   |
| <i>SLC34A2 b</i> | ENST00000513204 | 5.75                          | 3.45E-06     | up       | -0.44                              | 0.747265402  | No                                   |
| <i>PRAMEF19</i>  | ENST00000376101 | 5.60                          | 0.000249056  | up       | 0.25                               | 0.982576204  | No                                   |
| <i>PRAMEF5 a</i> | ENST00000622421 | 5.45                          | 1.85E-08     | up       | -0.73                              | 0.475006079  | No                                   |
| <i>PRAMEF5 b</i> | ENST00000621481 | 5.45                          | 1.85E-08     | up       | -0.73                              | 0.475006079  | No                                   |
| <i>PRAMEF1</i>   | ENST00000332296 | 5.36                          | 1.14E-07     | up       | -1.51                              | 8.51E-05     | Yes                                  |
| <i>TRIM43B</i>   | ENST00000432468 | 5.28                          | 3.97E-11     | up       | -1.64                              | 0.001063378  | Yes                                  |
| <i>PRAMEF12</i>  | ENST00000357726 | 5.26                          | 5.65E-07     | up       | -0.80                              | 0.345957318  | No                                   |
| <i>MBD3L2</i>    | ENST00000381393 | 5.21                          | 4.98E-10     | up       | -0.37                              | 0.576811781  | No                                   |

**Table S1 (cont'd.)**

| Gene*           | Transcript ID   | Non-treated FSHD vs Healthy** |              |          | Treated FSHD vs Non-treated FSHD** |              |                                      |
|-----------------|-----------------|-------------------------------|--------------|----------|------------------------------------|--------------|--------------------------------------|
|                 |                 | log2FC                        | adj. p-value | up/down? | log2FC                             | adj. p-value | significantly restored by treatment? |
| <i>TRIM49C</i>  | ENST00000448984 | 5.21                          | 0.000369479  | up       | -0.56                              | 0.876161011  | No                                   |
| <i>THOC5 a</i>  | ENST00000488052 | 5.18                          | 8.26E-07     | up       | -0.69                              | 0.495486875  | No                                   |
| <i>OLFMI</i>    | ENST00000252854 | 4.81                          | 8.15E-05     | up       | 0.12                               | 0.988946093  | No                                   |
| <i>HSPA1B b</i> | ENST00000391548 | 4.78                          | 4.55E-70     | up       | -0.02                              | 0.991152883  | No                                   |
| <i>TRIM49</i>   | ENST00000329758 | 4.78                          | 0.000403045  | up       | -1.55                              | 0.187848853  | No                                   |
| <i>TRIM49B</i>  | ENST00000332682 | 4.56                          | 1.13E-07     | up       | -0.73                              | 0.30431758   | No                                   |
| <i>PRAMEF11</i> | ENST00000619922 | 4.40                          | 0.010586296  | up       | -0.13                              | 0.992833412  | No                                   |
| <i>CENPA a</i>  | ENST00000475662 | 4.40                          | 0.000326357  | up       | -1.17                              | 0.84823361   | No                                   |
| <i>GPR37</i>    | ENST00000303921 | 4.39                          | 1.19E-08     | up       | 0.14                               | 0.981222213  | No                                   |
| <i>HSPA1A a</i> | ENST00000441618 | 4.31                          | 0.000662654  | up       | -0.39                              | 0.18443152   | No                                   |
| <i>SERPINF2</i> | ENST00000382061 | 4.07                          | 6.14E-05     | up       | 0.38                               | 0.891316067  | No                                   |
| <i>ZNF296</i>   | ENST00000303809 | 4.02                          | 0.004702231  | up       | -0.35                              | 0.969612411  | No                                   |
| <i>RFPL4B</i>   | ENST00000441065 | 3.87                          | 8.47E-08     | up       | -1.72                              | 1.44E-06     | Yes                                  |
| <i>PRAMEF8</i>  | ENST00000357367 | 3.78                          | 0.019759829  | up       | -3.05                              | 0.035391996  | Yes                                  |
| <i>TRIM53AP</i> | ENST00000532014 | 3.75                          | 0.001015777  | up       | -0.70                              | 0.597602437  | No                                   |
| <i>CCNA1 a</i>  | ENST00000255465 | 3.31                          | 3.94E-19     | up       | -0.37                              | 0.463772143  | No                                   |
| <i>CCNA1 b</i>  | ENST00000625767 | 3.27                          | 2.05E-16     | up       | -0.45                              | 0.09064676   | No                                   |
| <i>PTP4A3 a</i> | ENST00000520105 | 2.99                          | 3.12E-13     | up       | 0.43                               | 0.166532775  | No                                   |
| <i>RIPK4</i>    | ENST00000332512 | 2.93                          | 6.86E-10     | up       | -0.03                              | 0.995355899  | No                                   |
| <i>ACKR4</i>    | ENST00000249887 | 2.90                          | 0.000808967  | up       | -0.89                              | 0.226235022  | No                                   |
| <i>PPP2R2B</i>  | ENST00000394411 | 2.87                          | 0.004828947  | up       | -1.23                              | 0.845669111  | No                                   |
| <i>THOC5 b</i>  | ENST00000484924 | 2.78                          | 3.42E-05     | up       | -0.35                              | 0.909720201  | No                                   |
| <i>JUP a</i>    | ENST00000449889 | 2.59                          | 3.54E-07     | up       | 0.21                               | 0.957590214  | No                                   |
| <i>TRIM64B</i>  | ENST00000329862 | 2.51                          | 0.02102623   | up       | -1.45                              | 0.077007169  | No                                   |
| <i>C1QTNF3</i>  | ENST00000231338 | 2.41                          | 3.24E-51     | up       | -0.12                              | 0.916619331  | No                                   |
| <i>HPGD</i>     | ENST00000296522 | 2.37                          | 0.04900649   | up       | 0.12                               | 0.992774603  | No                                   |
| <i>JUP b</i>    | ENST00000591690 | 2.30                          | 8.74E-07     | up       | 0.00                               | 0.999964077  | No                                   |
| <i>PTP4A3 b</i> | ENST00000521578 | 2.29                          | 2.12E-25     | up       | 0.58                               | 0.002408606  | No                                   |
| <i>PNMA2</i>    | ENST00000522362 | 2.15                          | 1.87E-28     | up       | 0.03                               | 0.991303373  | No                                   |
| <i>SLAH1</i>    | ENST00000356721 | 2.06                          | 0.004347022  | up       | 0.05                               | 0.99534489   | No                                   |
| <i>THOC5 c</i>  | ENST00000443089 | 2.05                          | 1.24E-17     | up       | -0.20                              | 0.772030789  | No                                   |
| <i>TRIL</i>     | ENST00000539664 | 2.01                          | 0.001074742  | up       | 0.04                               | 0.994199094  | No                                   |
| <i>CCR4</i>     | ENST00000330953 | -2.11                         | 0.005067901  | down     | -0.53                              | 0.971783714  | No                                   |
| <i>MELK a</i>   | ENST00000298048 | -2.12                         | 0.000252848  | down     | 0.40                               | 0.94825751   | No                                   |
| <i>MTFR2 a</i>  | ENST00000420702 | -2.28                         | 0.010004786  | down     | 1.43                               | 0.630429768  | No                                   |
| <i>GOLGA6A</i>  | ENST00000290438 | -2.34                         | 5.35E-09     | down     | 0.50                               | 0.791090752  | No                                   |
| <i>BORA</i>     | ENST00000377815 | -2.38                         | 0.009935466  | down     | 0.05                               | 0.999371732  | No                                   |

**Table S1 (cont'd.)**

| Gene*           | Transcript ID   | Non-treated FSHD vs Healthy** |              |          | Treated FSHD vs Non-treated FSHD** |              |                                      |
|-----------------|-----------------|-------------------------------|--------------|----------|------------------------------------|--------------|--------------------------------------|
|                 |                 | log2FC                        | adj. p-value | up/down? | log2FC                             | adj. p-value | significantly restored by treatment? |
| <i>MTFR2 b</i>  | ENST00000451457 | -2.56                         | 0.036193589  | down     | -2.42                              | 0.866364671  | No                                   |
| <i>GOLGA6C</i>  | ENST00000300576 | -2.63                         | 3.60E-05     | down     | -0.79                              | 0.98271602   | No                                   |
| <i>MAP7D2</i>   | ENST00000379643 | -3.08                         | 2.21E-10     | down     | 0.14                               | 0.992774603  | No                                   |
| <i>MELK b</i>   | ENST00000626154 | -3.38                         | 0.003594245  | down     | -5.38                              | 0.478787787  | No                                   |
| <i>ODC1</i>     | ENST00000446285 | -3.74                         | 0.0101774    | down     | 3.37                               | 0.667785883  | No                                   |
| <i>CDC20 a</i>  | ENST00000372462 | -3.75                         | 0.000246158  | down     | -0.34                              | 0.992833412  | No                                   |
| <i>SCG5 a</i>   | ENST00000475752 | -3.81                         | 2.45E-38     | down     | -0.71                              | 0.776061124  | No                                   |
| <i>CENPA b</i>  | ENST00000233505 | -3.83                         | 0.012455446  | down     | -4.13                              | 0.862519595  | No                                   |
| <i>UBE2C a</i>  | ENST00000356455 | -3.83                         | 5.08E-57     | down     | -0.24                              | 0.944545174  | No                                   |
| <i>CDC20 b</i>  | ENST00000310955 | -3.98                         | 1.25E-87     | down     | -0.63                              | 0.263401187  | No                                   |
| <i>SCG5 b</i>   | ENST00000498607 | -3.99                         | 1.17E-07     | down     | -1.28                              | 0.967200594  | No                                   |
| <i>UBE2C b</i>  | ENST00000372568 | -4.33                         | 5.29E-07     | down     | 1.31                               | 0.943676285  | No                                   |
| <i>CD248</i>    | ENST00000311330 | -4.62                         | 2.42E-275    | down     | -0.08                              | 0.987440238  | No                                   |
| <i>SYT7</i>     | ENST00000542836 | -4.71                         | 1.31E-05     | down     | 2.44                               | 0.868797513  | No                                   |
| <i>DNER</i>     | ENST00000341772 | -4.91                         | 1.32E-88     | down     | -0.11                              | 0.991213343  | No                                   |
| <i>HSPA1B c</i> | ENST00000445736 | -5.32                         | 0.002037533  | down     | 0.24                               | 0.997320359  | No                                   |
| <i>CENPA c</i>  | ENST00000335756 | -5.48                         | 2.08E-06     | down     | 2.20                               | 0.716243485  | No                                   |
| <i>HSPA1B d</i> | ENST00000450744 | -6.14                         | 5.68E-05     | down     | 1.80                               | 0.6047912    | No                                   |
| <i>STIL b</i>   | ENST00000447475 | -6.84                         | 0.025544257  | down     | 6.90                               | 5.84E-05     | Yes                                  |
| <i>SPATA33</i>  | ENST00000579310 | -7.19                         | 7.01E-06     | down     | 5.94                               | 0.294771871  | No                                   |

\*letters after the underscore are arbitrary identifiers of different transcripts from the same gene

\*\*this group served as reference for the comparison

**Table S2.** Validation of some FSHD signature genes from RNA sequencing analysis

| Transcript            | Status in FSHD | Significantly restored by treatment in RNA-seq? | Validated by qPCR? (status, figure) |
|-----------------------|----------------|-------------------------------------------------|-------------------------------------|
| <i>TRIM51</i>         | up-regulated   | yes                                             | not validated                       |
| <i>TRIM43</i>         | up-regulated   | yes                                             | yes (restored, Fig. 1C)             |
| <i>SLC34A2_a</i>      | up-regulated   | yes                                             | not validated                       |
| <i>ZSCAN4</i>         | up-regulated   | yes                                             | yes (restored, Fig. 1C)             |
| <i>PRAMEF1</i>        | up-regulated   | yes                                             | not validated                       |
| <i>TRIM43B</i>        | up-regulated   | yes                                             | not validated                       |
| <i>RFPL4B</i>         | up-regulated   | yes                                             | not validated                       |
| <i>PRAMEF8</i>        | up-regulated   | yes                                             | not validated                       |
| <i>MBD3L2</i>         | up-regulated   | no                                              | yes (restored, Fig. 1C)             |
| <i>TRIM48</i>         | up-regulated   | no                                              | yes (restored, Fig. S1)             |
| <i>TRIM64B</i>        | up-regulated   | no                                              | yes (restored, Fig. S1)             |
| <i>PRAMEF4/5/9/11</i> | up-regulated   | no                                              | yes (restored, Fig. S1)             |
| <i>STIL_b</i>         | down-regulated | yes                                             | not validated                       |

**Table S3.** Characteristics of the immortalized human muscle cells used in this study.

| Cell ID | Disease Status | Sex    | Age at biopsy | EcoRI/BlnI allele size (4q haplotype) |
|---------|----------------|--------|---------------|---------------------------------------|
| WS229   | FSHD           | Male   | 66 y/o        | >112 kb (B) / 28 kb (A)               |
| WS234   | Healthy        | Female | 60 y/o        | >145 kb (B) / 107 kb (B)              |

**Table S4.** Primers used for qPCR evaluation of gene expression in this study.

| Gene                  | Forward (F) and Reverse (R) primers, 5' to 3'           |
|-----------------------|---------------------------------------------------------|
| <i>DUX4</i>           | F: CCCAGGTACCAGCAGACC<br>R: TCCAGGAGATGTA ACTCTAATCCA   |
| <i>GAPDH</i>          | F: GCAAATCCATGGCACCGT<br>R: AGGGATCTCGCTCCTGGAA         |
| <i>BANF1</i>          | F: TGACAAGGCCTATGTTGTCC<br>R: CACAAGTGTCTTTCAGCCATTC    |
| <i>SSR4</i>           | F: GCAGGCACCTATGAGGTTAG<br>R: CTCGTTATTCCTCTGAGCCTTC    |
| <i>FARP1</i>          | F: GACTGCCGAGCCGCTTT<br>R: TCTTGAGTTCGTGCAGCTTCTG       |
| <i>ZBTB7B</i>         | F: AACTGCCTCGCCACAT<br>R: CAGCTTGTCGTTCTGCTGGT          |
| <i>TRIM48</i>         | F: TATGGAGAGGAGGGACTCTTTAG<br>R: CTACATGGTTGGTAGGTCTTGG |
| <i>PRAMEF4/5/9/11</i> | F: CCAGAGCAGAAGAAGGAGATTG<br>R: TGGCCTTCGAGGAAAGAAAC    |
